# Supplementary material for: Utility of Preoperative Inflammatory Markers to Distinguish Epithelial Ovarian Cancer from Benign Ovarian Masses
Source: PubMed Central journal article supplement (PMC8040725; doi:10.7150/jca.51642), 2021-03-05

**Utility of Preoperative Inflammatory Markers to Distinguish Epithelial Ovarian Cancer  
from Benign Ovarian Masses**

Lian Li <sup>1,\*</sup>, Jing Tian <sup>1,2\*</sup>, Liwen Zhang <sup>1,\*</sup>, Luyang Liu <sup>1</sup>, Chao Sheng <sup>1</sup>, Yubei Huang  
<sup>1</sup>, Hong Zheng <sup>1</sup>, Fengju Song <sup>1</sup>, Kexin Chen <sup>1</sup>

<sup>1</sup> Department of Epidemiology and Biostatistics, National Clinical Research Center for Cancer, Key Laboratory of Cancer Prevention and Therapy of Tianjin, Tianjin Medical University Cancer Institute and Hospital, Tianjin, China.

<sup>2</sup> Department of Urology, National Clinical Research Center for Cancer, Key Laboratory of Cancer Prevention and Therapy of Tianjin, Tianjin Medical University Cancer Institute and Hospital, Tianjin, China.

**Correspondence to:** Kexin Chen, M.D., Ph.D., Professor and Chair, Department of Epidemiology and Biostatistics, National Clinical Research Center for Cancer, Key Laboratory of Cancer Prevention and Therapy of Tianjin, Tianjin Medical University Cancer Institute and Hospital, Huanhu Xi Road, Ti Yuan Bei, Hexi District, Tianjin, P.R. China 300060. Tel.: ++86 (0)2223372231; Fax: ++86 (0)2223372231; E-mail: [chenkexin@tjmuch.com](mailto:chenkexin@tjmuch.com).

\* These authors contributed equally to this work.

## Supplemental Figure Legends

Figure S1. Receiver operating characteristic (ROC) curves of inflammation markers in predicting risk of ovarian cancer by stage, (A) Early stages versus benign masses, (B) Advanced stages versus benign masses.

Figure S2. Receiver operating characteristic (ROC) curves of inflammation markers in predicting risk of ovarian cancer by histological subtype, (A) Serous ovarian cancer versus benign masses, (B) Endometrioid ovarian cancer versus benign masses, (C) Other types of EOC versus benign masses.

Figure S3. Receiver operating characteristic (ROC) curves of inflammation markers in predicting risk of ovarian cancer by menopausal status, (A) Premenopausal ovarian cancer versus benign masses, (B) Postmenopausal ovarian cancer versus benign masses.

Figure S4. Univariate and multivariate analyses for EOC risk in stratified analysis by histological subtypes in high level of CA125 patients ( $CA125 > 35$ ).

Figure S5. Univariate and multivariate analyses for EOC risk in stratified analysis by stage.

Figure S6. Univariate and multivariate analyses for EOC risk in stratified analysis by stage in low level of CA125 patients ( $CA125 \leq 35$ ).

Figure S7. Univariate and multivariate analyses for EOC risk in stratified analysis by stage in high level of CA125 patients ( $CA125 > 35$ ).

## **SUPPLEMENTAL TABLES**

Table S1. Demographic and epidemiological characteristics of patients.

|                          | Benign<br>(N=207, N, %) | Malignant<br>(N=887, N, %) | <i>P</i> value |
|--------------------------|-------------------------|----------------------------|----------------|
| Age (years, mean±SD)     | 47.17±14.66             | 54.23± 10.57               | <0.001         |
| Menopause                |                         |                            |                |
| No                       | 106 (55.50)             | 280 (33.14)                | <0.001         |
| Yes                      | 85 (44.50)              | 565 (66.86)                |                |
| BMI (kg/m <sup>2</sup> ) |                         |                            |                |
| <25                      | 127 (61.35)             | 571 (64.37)                | 0.415          |
| ≥25                      | 80 (38.65)              | 316 (35.63)                |                |
| Family history of cancer |                         |                            |                |
| No                       | 161 (81.31)             | 649 (75.47)                | 0.080          |
| Yes                      | 37 (18.69)              | 211 (24.53)                |                |
| Alcohol consumption      |                         |                            |                |
| No                       | 196 (99.49)             | 824 (97.51)                | 0.044          |
| Yes                      | 1 (0.51)                | 21 (2.49)                  |                |
| Age of menarche (years)  |                         |                            |                |
| ≤13                      | 64 (30.92)              | 231 (26.04)                | 0.155          |
| >13                      | 143 (69.08)             | 656 (73.96)                |                |
| Number of pregnancies    |                         |                            |                |
| ≤2                       | 104 (50.24)             | 425 (47.91)                | 0.546          |
| >2                       | 103 (49.76)             | 462 (52.09)                |                |
| Number of live births    |                         |                            |                |
| ≤1                       | 133 (64.25)             | 518 (58.40)                | 0.123          |
| >1                       | 74 (35.75)              | 369 (41.60)                |                |
| Abortion                 |                         |                            |                |
| No                       | 58 (28.02)              | 295 (33.26)                | 0.147          |
| Yes                      | 149 (71.98)             | 592 (66.74)                |                |

BMI, body mass index

Table S2. Clinical and pathological features of patients.

|                           | Benign ovarian masses<br>( <i>N</i> =207, <i>N</i> , %) | Malignant ovarian cancer<br>( <i>N</i> =887, <i>N</i> , %) |
|---------------------------|---------------------------------------------------------|------------------------------------------------------------|
| Tumor diameter (cm)       |                                                         |                                                            |
| <5                        | 85 (41.06)                                              | 337 (37.99)                                                |
| ≥5                        | 122 (58.94)                                             | 550 (62.01)                                                |
| Pathology                 |                                                         |                                                            |
| Benign ovarian masses     |                                                         |                                                            |
| Serous cystadenoma        | 33 (15.94)                                              | —                                                          |
| Mucinous cystadenoma      | 11 (5.31)                                               | —                                                          |
| Mature teratoma           | 81 (39.13)                                              | —                                                          |
| Others                    | 82(39.62)                                               | —                                                          |
| Epithelial ovarian cancer |                                                         |                                                            |
| Serous                    | —                                                       | 477 (53.78)                                                |
| Mucinous                  | —                                                       | 55 (6.20)                                                  |
| Endometrioid              | —                                                       | 194 (21.87)                                                |
| Other EOC                 | —                                                       | 161 (18.15)                                                |
| Stage                     |                                                         |                                                            |
| I                         | —                                                       | 133 (15.36)                                                |
| II                        | —                                                       | 165 (19.05)                                                |
| III                       | —                                                       | 483 (55.77)                                                |
| IV                        | —                                                       | 85 (9.82)                                                  |
| Residual disease (cm)     |                                                         |                                                            |
| ≤1                        | —                                                       | 437 (75.22)                                                |
| >1                        | —                                                       | 144 (24.78)                                                |

EOC, epithelial ovarian cancer

Table S3. Univariate and multivariate logistic regression model showing association of biomarkers with malignancy.

| Variables                | OR (95%CI)          | <i>P</i> value | OR (95%CI)*         | <i>P</i> value * |
|--------------------------|---------------------|----------------|---------------------|------------------|
| CA125 (U/mL)             | 1.006 (1.005-1.007) | <0.001         | 1.006 (1.004-1.007) | <0.001           |
| HGB (g/L)                | 0.972 (0.960-0.985) | <0.001         | 0.973 (0.960-0.986) | <0.001           |
| MCV (fL)                 | 0.964 (0.934-0.995) | 0.024          | 0.946 (0.914-0.978) | 0.001            |
| HCT (%)                  | 0.931 (0.889-0.974) | 0.002          | 0.928 (0.884-0.973) | 0.002            |
| WBC (10 <sup>9</sup> /L) | 1.310 (1.191-1.447) | <0.001         | 1.323 (1.199-1.467) | <0.001           |
| NLR                      | 2.061 (1.750-2.455) | <0.001         | 2.009 (1.701-2.340) | <0.001           |
| PLR                      | 1.012 (1.009-1.014) | <0.001         | 1.011 (1.009-1.014) | <0.001           |
| LMR                      | 0.811 (0.756-0.868) | <0.001         | 0.823 (0.766-0.883) | <0.001           |
| Age at diagnosis         | 1.054 (1.039-1.068) | <0.001         | -                   | -                |

CA125, Cancer Antigen 125; HGB, hemoglobin; MCV, mean corpuscular volume; HCT, hematocrit; WBC, white blood cell count; NLR, neutrophil-to-lymphocyte ratio; PLR, platelet-to-lymphocyte ratio; LMR, lymphocyte lymphocyte-to- monocyte ratio; OR = odds ratio, CI = confidence interval.

\* adjusted for age.

Table S4. Area under the curve (AUC) for discriminating all malignant cases from benign cases adjusted for age.

| Variables                | AUC  | 95% CI    | Cut-off | Sensitivity (%) | Specificity (%) |
|--------------------------|------|-----------|---------|-----------------|-----------------|
| CA125 (U/mL)             | 90.8 | 88.6-92.9 | 193.65  | 78.6            | 89.4            |
| HGB (g/L)                | 54.2 | 49.5-58.9 | 165.5   | 79.5            | 32.4            |
| MCV (fL)                 | 62.4 | 57.7-67.2 | 130.35  | 86.2            | 38.6            |
| HCT (%)                  | 62.8 | 58.0-67.6 | 83.55   | 80.8            | 45.9            |
| WBC (10 <sup>9</sup> /L) | 67.4 | 62.8-72.1 | 53.525  | 78.8            | 55.8            |
| NLR                      | 67.6 | 62.9-72.3 | 49.673  | 78.6            | 54.4            |
| PLR                      | 75.4 | 72.1-78.8 | 215.023 | 62.2            | 78.3            |
| LMR                      | 62.7 | 57.9-67.5 | 52.835  | 70.2            | 56.3            |

CA125, Cancer Antigen 125; HGB, hemoglobin; MCV, mean corpuscular volume; HCT, hematocrit; WBC, white blood cell count; NLR, neutrophil-to-lymphocyte ratio; PLR, platelet-to-lymphocyte ratio; LMR, lymphocyte lymphocyte-to- monocyte ratio; AUC, Area under curve; CI = confidence interval.

Table S5. Area under the curve (AUC) for discriminating malignant from benign in stratified analysis by stage.

| Variables                             | AUC  | 95% CI    | Cut-off | Sensitivity (%) | Specificity (%) |
|---------------------------------------|------|-----------|---------|-----------------|-----------------|
| Early stage malignant vs. benign      |      |           |         |                 |                 |
| CA125 (U/mL)                          | 81.3 | 77.6-85.1 | 59.03   | 68.4            | 78.9            |
| HGB (g/L)                             | 54.7 | 49.6-59.8 | 131.5   | 62.8            | 46.9            |
| MCV (fL)                              | 51.2 | 46.0-56.3 | 87.15   | 23.8            | 80.7            |
| HCT (%)                               | 52.4 | 47.3-57.6 | 42.15   | 87.6            | 18.4            |
| WBC (10 <sup>9</sup> /L)              | 61.9 | 56.9-66.9 | 5.295   | 80.9            | 40.3            |
| NLR                                   | 62.3 | 57.4-67.2 | 2.015   | 53.4            | 66.5            |
| PLR                                   | 58.3 | 53.3-63.3 | 141.864 | 56.0            | 60.9            |
| LMR                                   | 56.5 | 51.5-61.6 | 3.619   | 32.8            | 83.0            |
| Advantaged stage malignant vs. benign |      |           |         |                 |                 |
| CA125 (U/mL)                          | 95.4 | 93.6-97.1 | 228.7   | 85.2            | 95.5            |
| HGB (g/L)                             | 62.6 | 58.2-66.9 | 123.5   | 47.9            | 72.9            |
| MCV (fL)                              | 58.6 | 54.1-63.2 | 87.15   | 34.5            | 80.7            |
| HCT (%)                               | 59.0 | 54.6-63.5 | 38.75   | 56.3            | 59.9            |
| WBC (10 <sup>9</sup> /L)              | 64.4 | 60.1-68.8 | 5.815   | 71.0            | 52.4            |

---

|     |      |           |        |      |      |
|-----|------|-----------|--------|------|------|
| NLR | 81.6 | 78.2-84.9 | 2.139  | 78.3 | 71.8 |
| PLR | 80.9 | 77.7-84.1 | 196.41 | 60.3 | 90.8 |
| LMR | 78.5 | 74.9-82.0 | 3.615  | 65.0 | 83.0 |

---

CA125, Cancer Antigen 125; HGB, hemoglobin; MCV, mean corpuscular volume; HCT, hematocrit; WBC, white blood cell count; NLR, neutrophil-to-lymphocyte ratio; PLR, platelet-to-lymphocyte ratio; LMR, lymphocyte lymphocyte-to- monocyte ratio; AUC, Area under curve; CI = confidence interval.



Table S6. Area under the curve (AUC) for discriminating malignant from benign in stratified analysis by stage adjusted for age.

| Variables                             | AUC  | 95%CI     | Cut-off | Sensitivity (%) | Specificity (%) |
|---------------------------------------|------|-----------|---------|-----------------|-----------------|
| Early stage malignant vs. benign      |      |           |         |                 |                 |
| CA125 (U/mL)                          | 81.1 | 77.2-84.9 | 106.535 | 70.9            | 77.4            |
| HGB (g/L)                             | 55.3 | 50.2-60.5 | 164.5   | 80.9            | 30.4            |
| MCV (fL)                              | 60.8 | 55.7-65.9 | 130.35  | 82.9            | 38.6            |
| HCT (%)                               | 60.4 | 55.3-65.6 | 83.55   | 76.2            | 45.9            |
| WBC (10 <sup>9</sup> /L)              | 63.7 | 58.6-68.8 | 53.56   | 72.1            | 55.8            |
| NLR                                   | 62.8 | 57.6-67.9 | 51.023  | 66.4            | 57.8            |
| PLR                                   | 61.4 | 56.5-66.4 | 192.133 | 56.7            | 62.3            |
| LMR                                   | 60.9 | 55.7-66.1 | 52.874  | 66.2            | 56.3            |
| Advantaged stage malignant vs. benign |      |           |         |                 |                 |
| CA125 (U/mL)                          | 95.7 | 94.1-97.4 | 276.4   | 85.4            | 96.0            |
| HGB (g/L)                             | 53.6 | 48.6-58.5 | 162.5   | 84.8            | 27.5            |
| MCV (fL)                              | 63.3 | 58.4-68.2 | 131.25  | 86.7            | 40.1            |
| HCT (%)                               | 64.1 | 59.1-69.0 | 83.6    | 83.2            | 45.9            |
| WBC (10 <sup>9</sup> /L)              | 69.4 | 64.6-74.2 | 53.525  | 82.3            | 55.8            |

---

|     |      |           |         |      |      |
|-----|------|-----------|---------|------|------|
| NLR | 70.1 | 65.3-74.9 | 49.673  | 83.8 | 54.4 |
| PLR | 83.0 | 79.8-86.1 | 215.385 | 74.9 | 78.3 |
| LMR | 63.7 | 58.6-68.7 | 52.835  | 72.3 | 56.3 |

---

CA125, Cancer Antigen 125; HGB, hemoglobin; MCV, mean corpuscular volume; HCT, hematocrit; WBC, white blood cell count; NLR, neutrophil-to-lymphocyte ratio; PLR, platelet-to-lymphocyte ratio; LMR, lymphocyte lymphocyte-to- monocyte ratio; AUC, Area under curve; CI = confidence interval.

Table S7. Area under the curve (AUC) for discriminating malignant from benign in stratified analysis by histological subtype.

| Variables                              | AUC  | 95%CI     | Cut-off | Sensitivity | Specificity |
|----------------------------------------|------|-----------|---------|-------------|-------------|
| Serous ovarian cancer vs. benign       |      |           |         |             |             |
| CA125 (U/mL)                           | 93.1 | 91.0-95.2 | 228.7   | 78.8        | 95.5        |
| HGB (g/L)                              | 60.5 | 55.9-65.0 | 124.5   | 46.0        | 71.0        |
| MCV (fL)                               | 56.6 | 51.9-61.4 | 87.15   | 31.7        | 80.7        |
| HCT (%)                                | 57.4 | 52.8-62.0 | 38.65   | 52.4        | 60.9        |
| WBC (10 <sup>9</sup> /L)               | 62.0 | 57.8-66.9 | 5.815   | 69.7        | 52.4        |
| NLR                                    | 74.7 | 70.8-78.6 | 2.14    | 68.2        | 71.8        |
| PLR                                    | 73.6 | 69.8-77.4 | 182.698 | 52.8        | 86.5        |
| LMR                                    | 71.2 | 67.1-75.3 | 3.619   | 53.4        | 83.0        |
| Endometrioid ovarian cancer vs. benign |      |           |         |             |             |
| CA125 (U/mL)                           | 91.7 | 88.8-94.5 | 129.0   | 84.0        | 88.4        |
| HGB (g/L)                              | 59.3 | 53.8-64.9 | 124.5   | 45.4        | 71.0        |
| MCV (fL)                               | 58.2 | 52.6-63.7 | 90.05   | 60.8        | 54.6        |
| HCT (%)                                | 55.5 | 49.9-61.2 | 38.75   | 51.5        | 59.9        |
| WBC (10 <sup>9</sup> /L)               | 66.5 | 61.3-71.8 | 7.14    | 42.8        | 80.6        |

|                          |      |           |         |      |      |
|--------------------------|------|-----------|---------|------|------|
| NLR                      | 76.1 | 71.4-80.7 | 2.49    | 57.8 | 84.5 |
| PLR                      | 73.0 | 68.0-78.0 | 155.814 | 67.2 | 71.5 |
| LMR                      | 73.5 | 68.6-78.5 | 3.599   | 57.8 | 83.0 |
| Other EOC vs. benign     |      |           |         |      |      |
| CA125 (U/mL)             | 84.1 | 80.3-87.9 | 59.03   | 74.4 | 78.9 |
| HGB (g/L)                | 59.0 | 53.6-64.5 | 129.5   | 62.3 | 53.1 |
| MCV (fL)                 | 53.6 | 48.1-59.2 | 87.15   | 29.3 | 80.7 |
| HCT (%)                  | 56.5 | 51.0-61.9 | 35.65   | 21.4 | 89.9 |
| WBC (10 <sup>9</sup> /L) | 63.7 | 58.5-69.0 | 5.3     | 83.3 | 40.3 |
| NLR                      | 74.3 | 69.7-79.0 | 2.139   | 67.4 | 71.8 |
| PLR                      | 71.7 | 66.7-76.6 | 196.477 | 45.3 | 90.8 |
| LMR                      | 67.8 | 62.6-72.9 | 3.615   | 50.2 | 83.0 |

CA125, Cancer Antigen 125; HGB, hemoglobin; MCV, mean corpuscular volume; HCT, hematocrit; WBC, white blood cell count; NLR, neutrophil-to-lymphocyte ratio; PLR, platelet-to-lymphocyte ratio; LMR, lymphocyte lymphocyte-to- monocyte ratio; EOC, epithelial ovarian cancer; AUC, Area under curve; CI = confidence interval.

Table S8. Area under the curve (AUC) for discriminating malignant from benign in stratified analysis by histological subtype adjusted for age.

| Variables                              | AUC  | 95%CI     | Cut-off | Sensitivity | Specificity |
|----------------------------------------|------|-----------|---------|-------------|-------------|
| Serous ovarian cancer vs. benign       |      |           |         |             |             |
| CA125 (U/mL)                           | 93.3 | 91.3-95.4 | 276.4   | 78.8        | 96.0        |
| HGB (g/L)                              | 54.0 | 49.0-59.0 | 164.5   | 83.6        | 30.4        |
| MCV (fL)                               | 62.8 | 57.8-67.7 | 131.25  | 85.5        | 40.1        |
| HCT (%)                                | 63.2 | 58.1-68.2 | 83.55   | 82.7        | 45.9        |
| WBC (10 <sup>9</sup> /L)               | 67.8 | 62.9-72.7 | 53.525  | 80.6        | 55.8        |
| NLR                                    | 68.0 | 63.1-72.9 | 49.949  | 79.2        | 54.9        |
| PLR                                    | 76.1 | 72.4-79.8 | 212.59  | 64.0        | 77.3        |
| LMR                                    | 63.3 | 58.2-68.3 | 52.835  | 72.5        | 56.3        |
| Endometrioid ovarian cancer vs. benign |      |           |         |             |             |
| CA125 (U/mL)                           | 92.4 | 89.7-95.1 | 203.15  | 84.0        | 89.9        |
| HGB (g/L)                              | 55.1 | 49.5-60.8 | 173.5   | 68.6        | 44.4        |
| MCV (fL)                               | 62.2 | 56.7-67.7 | 129.75  | 89.7        | 37.2        |
| HCT (%)                                | 63.4 | 58.0-68.9 | 77.7    | 93.3        | 33.8        |
| WBC (10 <sup>9</sup> /L)               | 68.0 | 62.8-73.3 | 49.28   | 92.3        | 40.8        |

|                          |      |           |         |      |      |
|--------------------------|------|-----------|---------|------|------|
| NLR                      | 67.6 | 62.3-72.9 | 45.712  | 91.1 | 40.8 |
| PLR                      | 75.6 | 70.8-80.4 | 226.352 | 60.9 | 82.6 |
| LMR                      | 62.7 | 57.1-68.2 | 46.36   | 90.1 | 36.4 |
| Other EOC vs. benign     |      |           |         |      |      |
| CA125 (U/mL)             | 83.5 | 79.6-87.5 | 106.535 | 76.4 | 77.4 |
| HGB (g/L)                | 53.7 | 48.1-59.2 | 172.5   | 67.9 | 42.5 |
| MCV (fL)                 | 61.9 | 56.5-67.3 | 138.75  | 67.9 | 57.0 |
| HCT (%)                  | 61.6 | 56.2-67.0 | 78.25   | 87.4 | 35.3 |
| WBC (10 <sup>9</sup> /L) | 66.2 | 60.9-71.4 | 53.24   | 79.1 | 53.9 |
| NLR                      | 66.6 | 61.4-71.9 | 49.707  | 78.6 | 54.4 |
| PLR                      | 74.0 | 69.3-78.7 | 261.421 | 44.9 | 93.2 |
| LMR                      | 61.5 | 56.1-67.0 | 53.275  | 67.0 | 57.8 |

CA125, Cancer Antigen 125; HGB, hemoglobin; MCV, mean corpuscular volume; HCT, hematocrit; WBC, white blood cell count; NLR, neutrophil-to-lymphocyte ratio; PLR, platelet-to-lymphocyte ratio; LMR, lymphocyte lymphocyte-to- monocyte ratio; EOC, epithelial ovarian cancer; AUC, Area under curve; CI = confidence interval.

Table S9. Area under the curve (AUC) for discriminating malignant from benign in stratified analysis by menopausal status.

| Variables                | AUC  | 95%CI     | Cut-off | Sensitivity | Specificity |
|--------------------------|------|-----------|---------|-------------|-------------|
| <b>Premenopausal</b>     |      |           |         |             |             |
| CA125 (U/mL)             | 89.5 | 86.0-93.0 | 228.7   | 71.3        | 94.1        |
| HGB (g/L)                | 58.5 | 52.2-64.8 | 132.5   | 70.3        | 44.3        |
| MCV (fL)                 | 56.3 | 50.0-62.6 | 87.25   | 40.9        | 74.5        |
| HCT (%)                  | 56.2 | 49.8-62.6 | 35.95   | 26.9        | 84.9        |
| WBC (10 <sup>9</sup> /L) | 63.7 | 57.6-69.8 | 5.81    | 74.5        | 47.2        |
| NLR                      | 74.9 | 69.8-80.0 | 2.59    | 55.2        | 84.0        |
| PLR                      | 74.7 | 69.7-79.7 | 182.243 | 54.8        | 87.7        |
| LMR                      | 73.6 | 68.5-78.6 | 3.624   | 56.6        | 84.9        |
| <b>Postmenopausal</b>    |      |           |         |             |             |
| CA125 (U/mL)             | 90.9 | 88.0-93.9 | 133.95  | 78.8        | 91.5        |
| HGB (g/L)                | 61.7 | 55.7-67.6 | 123.5   | 41.7        | 81.2        |
| MCV (fL)                 | 60.0 | 53.4-66.6 | 93.35   | 81.6        | 35.3        |
| HCT (%)                  | 58.8 | 52.6-65.0 | 38.75   | 49.9        | 68.2        |
| WBC (10 <sup>9</sup> /L) | 64.4 | 57.9-70.9 | 6.030   | 61.3        | 65.5        |

---

|     |      |           |         |      |      |
|-----|------|-----------|---------|------|------|
| NLR | 75.0 | 69.6-80.4 | 2.113   | 66.9 | 73.8 |
| PLR | 71.5 | 66.1-76.8 | 196.197 | 45.1 | 90.6 |
| LMR | 69.1 | 63.2-75.0 | 3.721   | 52.9 | 81.0 |

---

CA125, Cancer Antigen 125; HGB, hemoglobin; MCV, mean corpuscular volume; HCT, hematocrit; WBC, white blood cell count; NLR, neutrophil-to-lymphocyte ratio; PLR, platelet-to-lymphocyte ratio; LMR, lymphocyte lymphocyte-to- monocyte ratio; AUC, Area under curve; CI = confidence interval.



Table S10. Area under the curve (AUC) for discriminating malignant from benign in stratified analysis by menopausal status adjusted for age.

| Variables                | AUC  | 95%CI     | Cut-off | Sensitivity | Specificity |
|--------------------------|------|-----------|---------|-------------|-------------|
| <b>Premenopausal</b>     |      |           |         |             |             |
| CA125 (U/mL)             | 89.2 | 85.6-92.7 | 275.05  | 70.9        | 95.0        |
| HGB (g/L)                | 55.4 | 48.9-61.9 | 172.5   | 43.4        | 68.9        |
| MCV (fL)                 | 65.8 | 59.6-72.1 | 129.9   | 65.9        | 61.3        |
| HCT (%)                  | 67.2 | 60.9-73.6 | 77.4    | 78.5        | 54.7        |
| WBC (10 <sup>9</sup> /L) | 74.7 | 69.2-80.2 | 47.225  | 79.1        | 59.4        |
| NLR                      | 74.8 | 69.3-80.4 | 43.012  | 80.6        | 60.4        |
| PLR                      | 76.8 | 72.0-81.7 | 224.952 | 54.8        | 89.6        |
| LMR                      | 67.1 | 60.9-73.3 | 45.159  | 74.2        | 56.6        |
| <b>Postmenopausal</b>    |      |           |         |             |             |
| CA125 (U/mL)             | 90.3 | 87.3-93.3 | 190.75  | 79.1        | 90.2        |
| HGB (g/L)                | 63.3 | 57.1-69.5 | 190.5   | 63.8        | 55.3        |
| MCV (fL)                 | 57.6 | 50.9-64.3 | 150.55  | 59.8        | 55.3        |
| HCT (%)                  | 57.7 | 50.9-64.5 | 97.05   | 49.7        | 64.7        |
| WBC (10 <sup>9</sup> /L) | 51.2 | 44.1-58.3 | 65.115  | 51.4        | 57.1        |

---

|     |      |           |        |      |      |
|-----|------|-----------|--------|------|------|
| NLR | 50.5 | 43.3-57.7 | 73.529 | 90.0 | 17.9 |
| PLR | 71.3 | 65.9-76.7 | 209.7  | 66.5 | 69.4 |
| LMR | 58.9 | 52.0-65.9 | 66.898 | 71.1 | 46.4 |

---

HGB, hemoglobin; MCV, mean corpuscular volume; HCT, hematocrit; WBC, white blood cell count; PLT, platelet; NP, neutrophil percentage; LP, lymphocyte percentage; NLR, neutrophil-to-lymphocyte ratio; PLR, platelet-to-lymphocyte ratio; AUC, Area under curve; CI = confidence interval.

## SUPPLEMENTAL FIGURES

Figure S1.

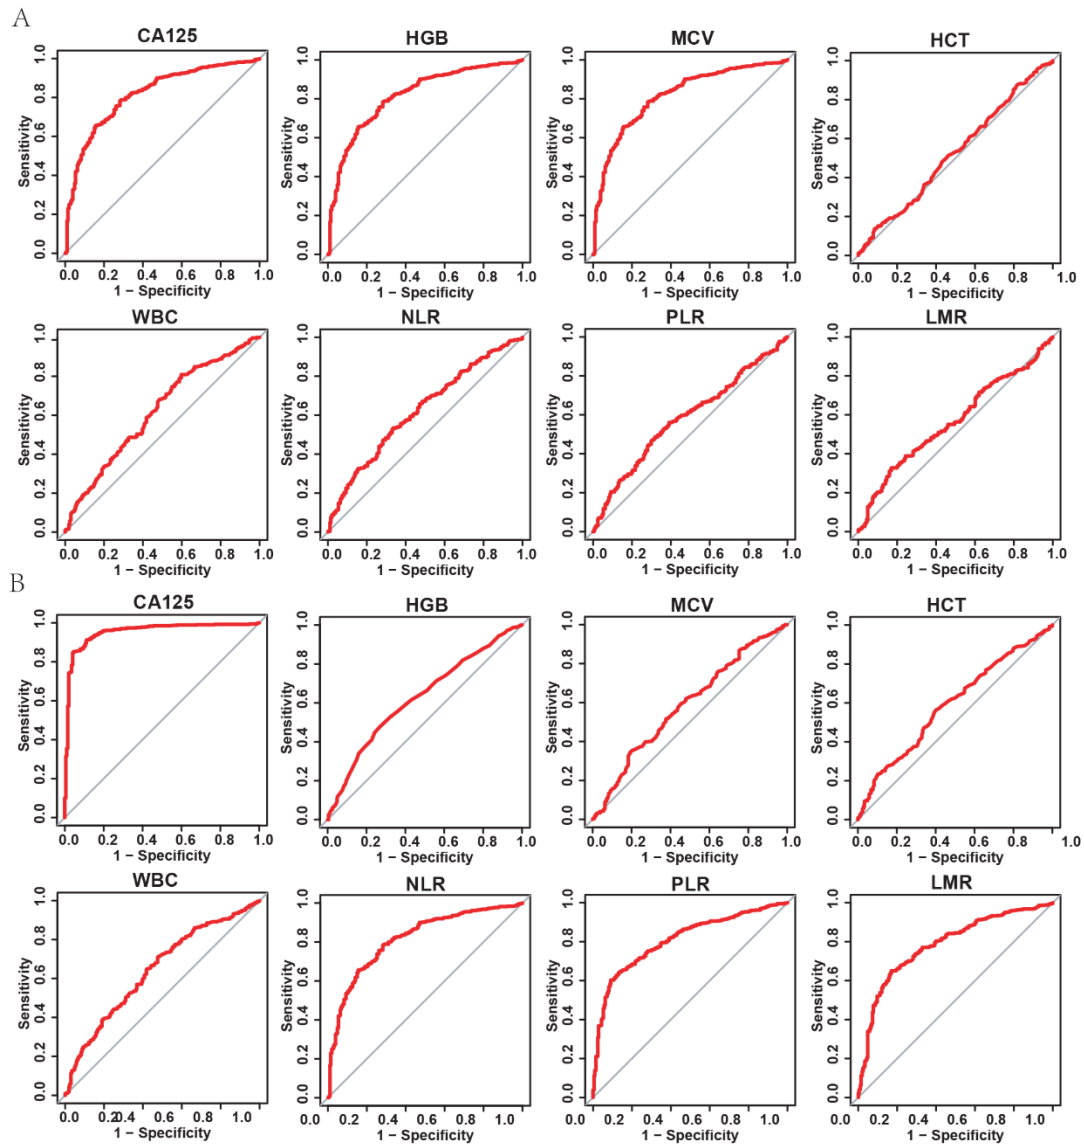

Figure S2.

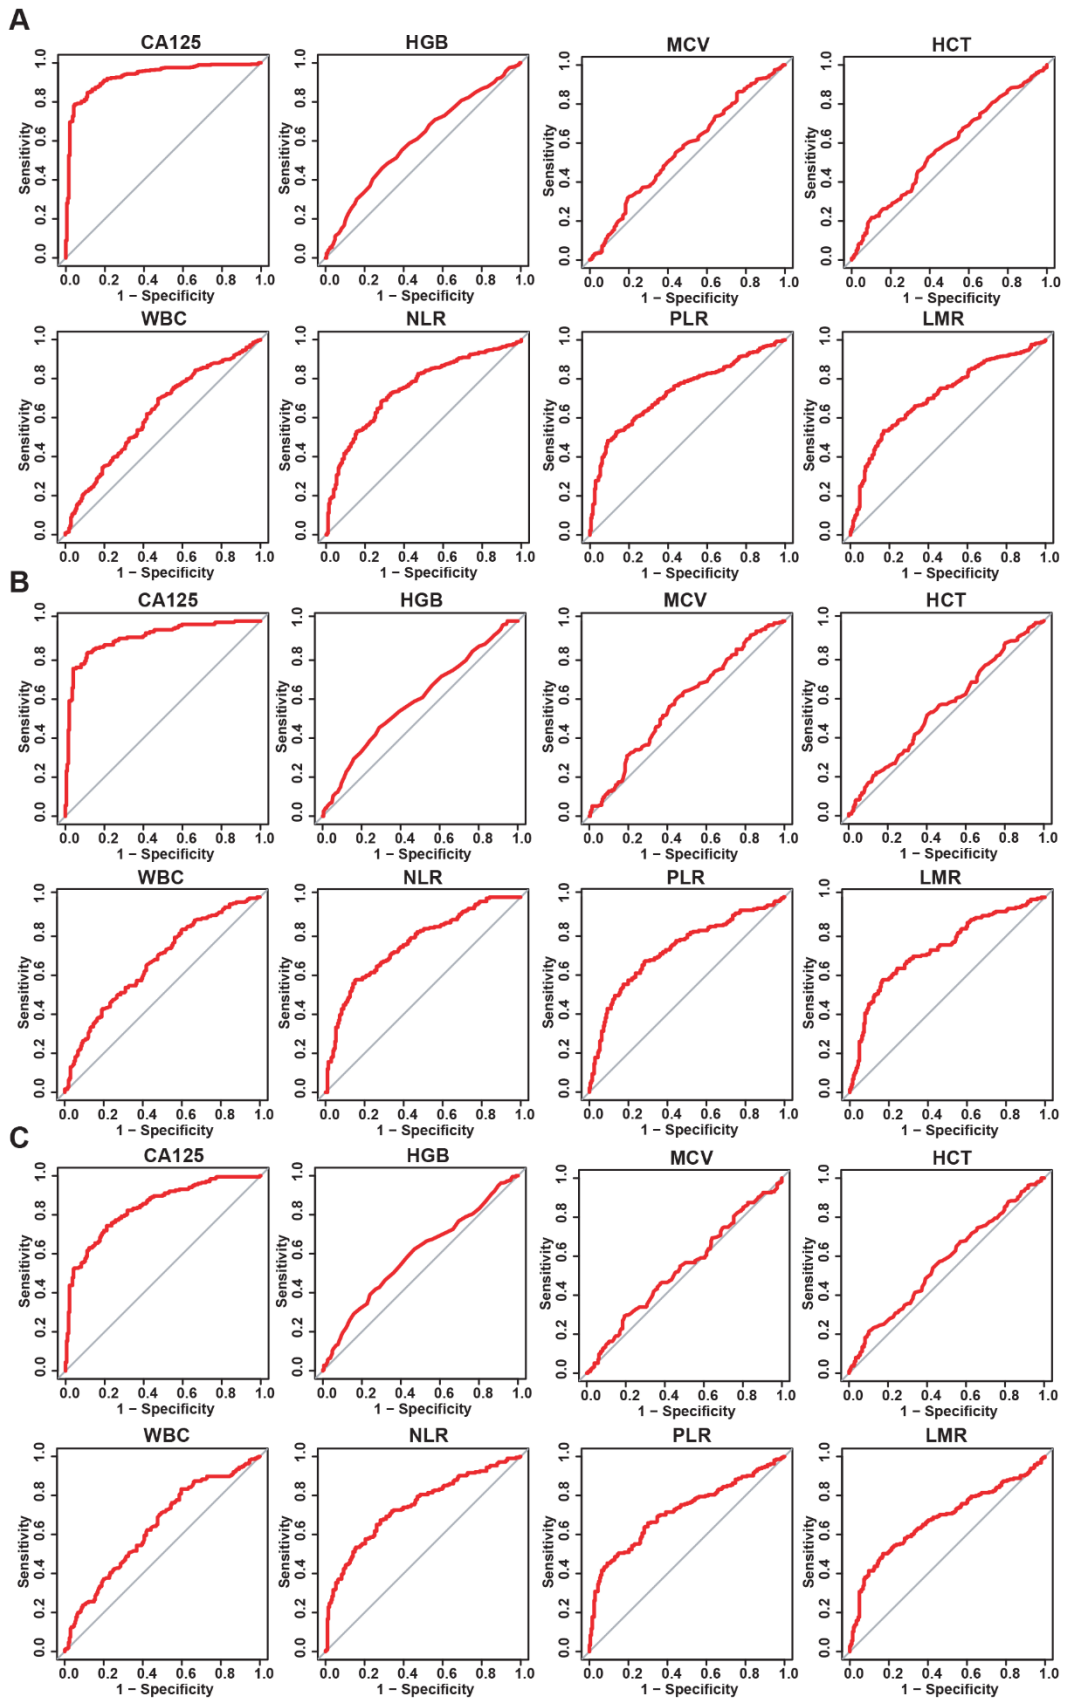

Figure S3.

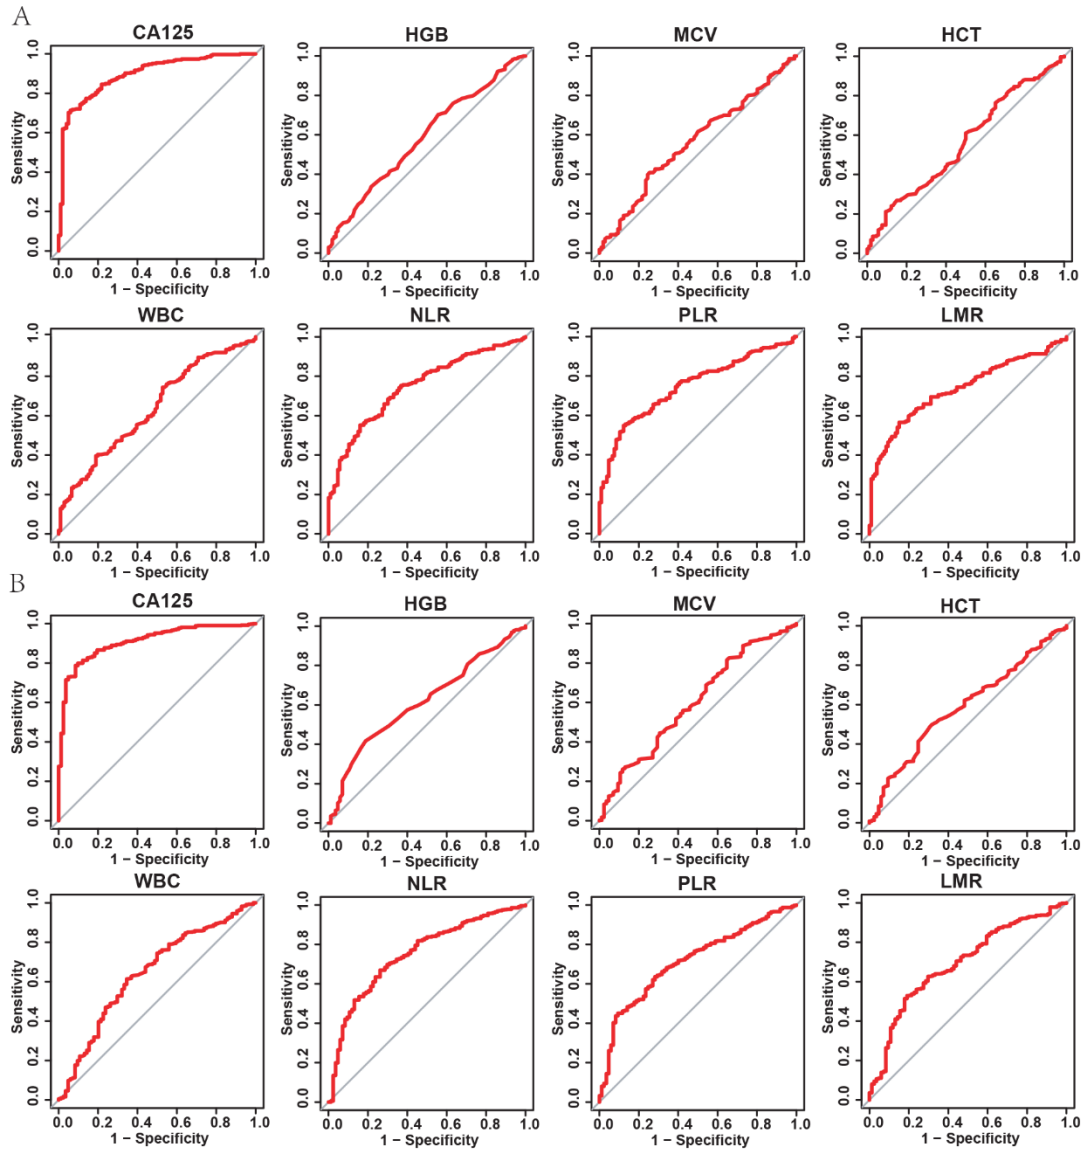

**Figure S4.**

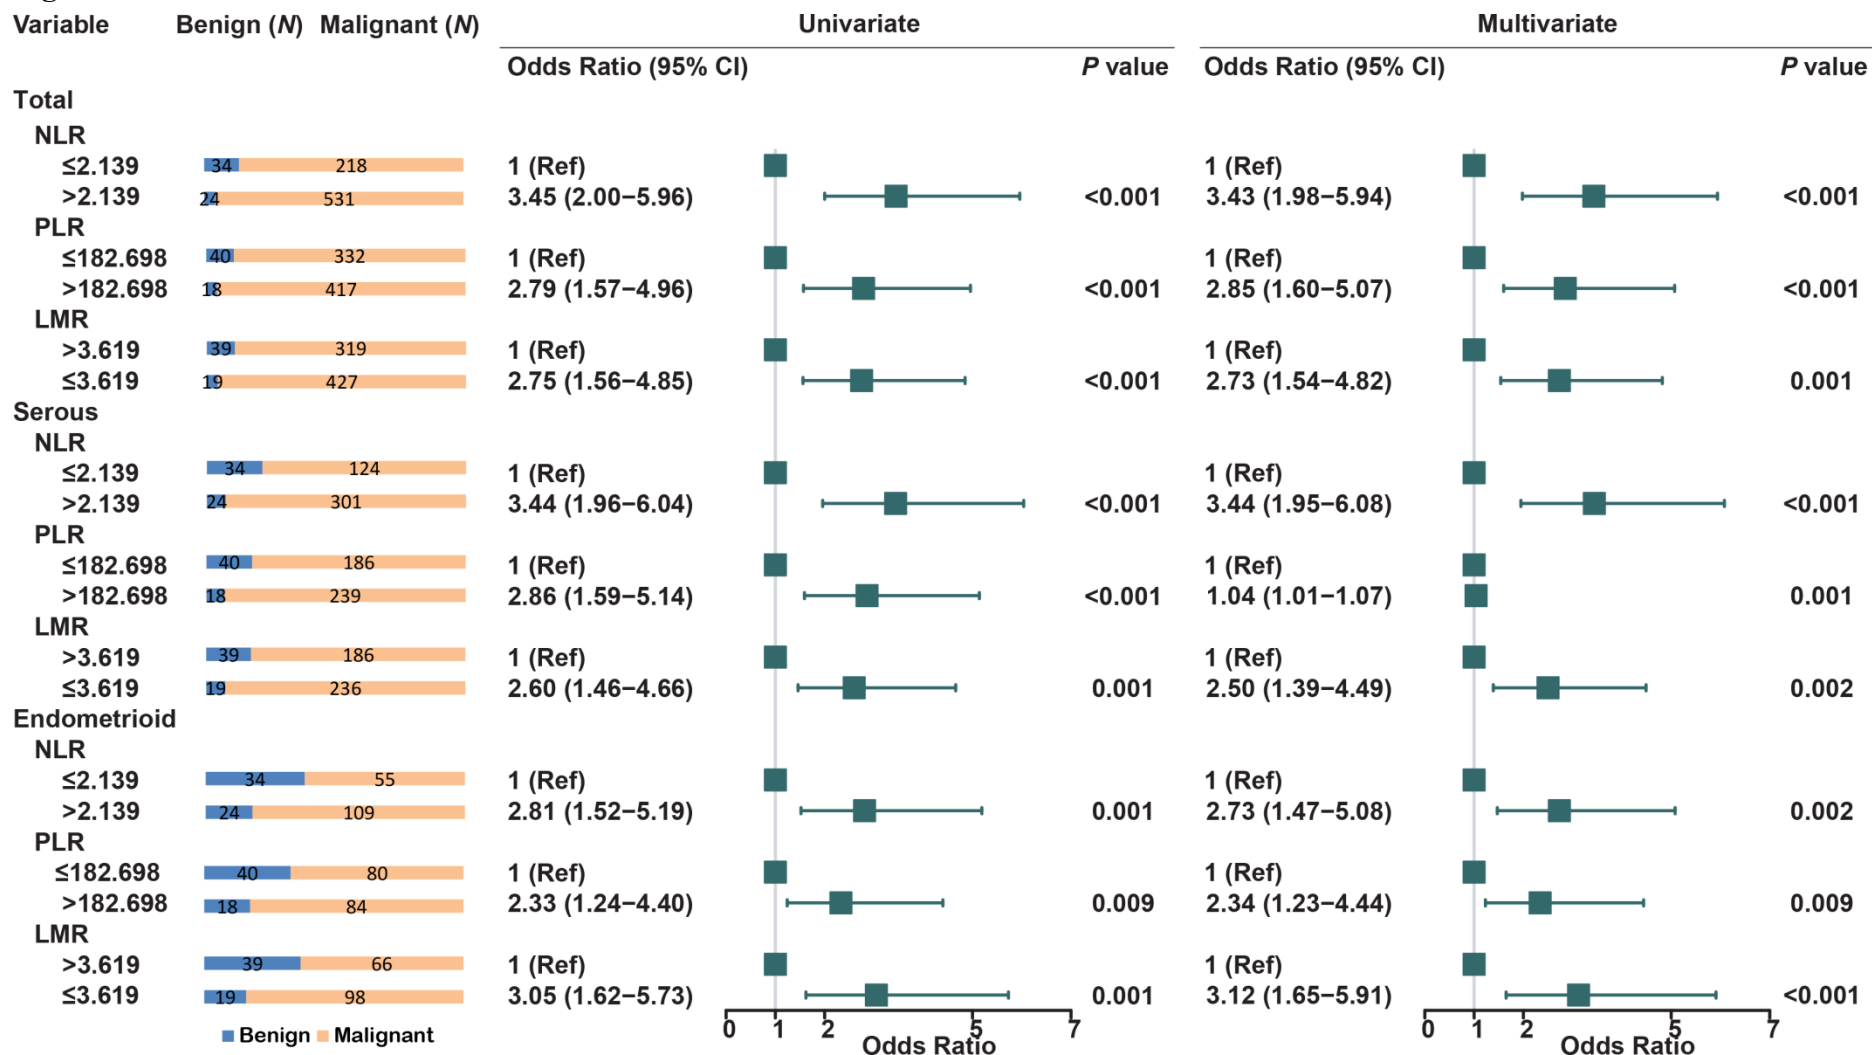

**Figure S5.**

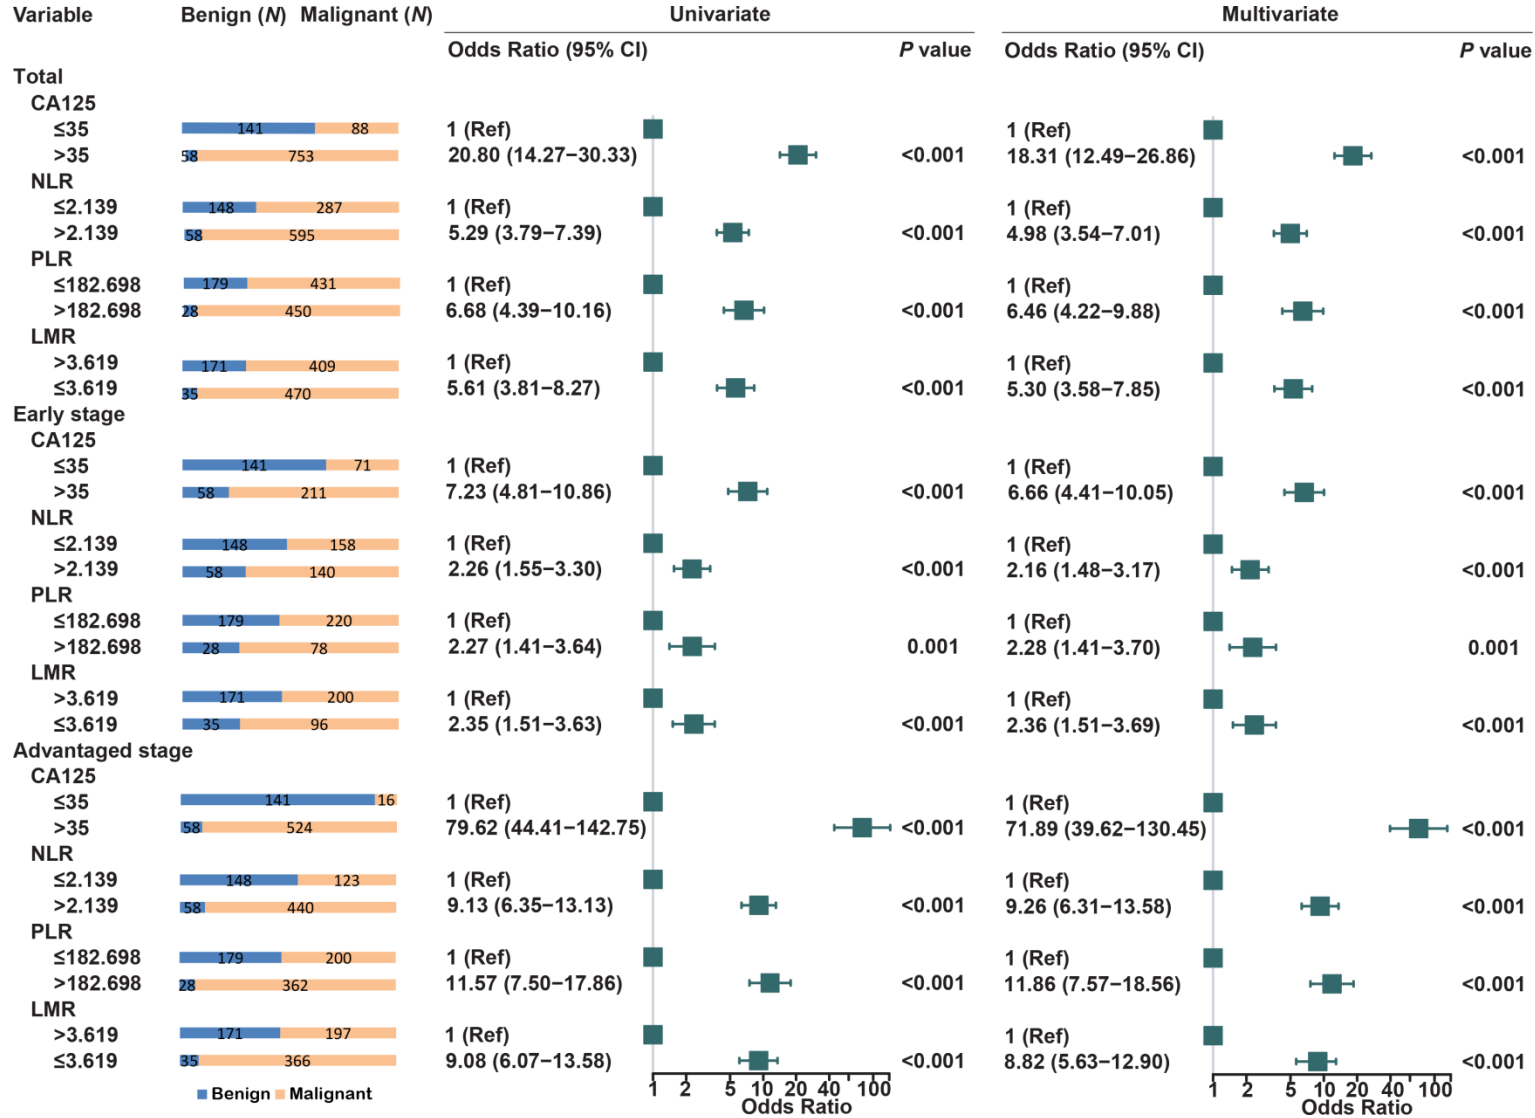

Figure S6.

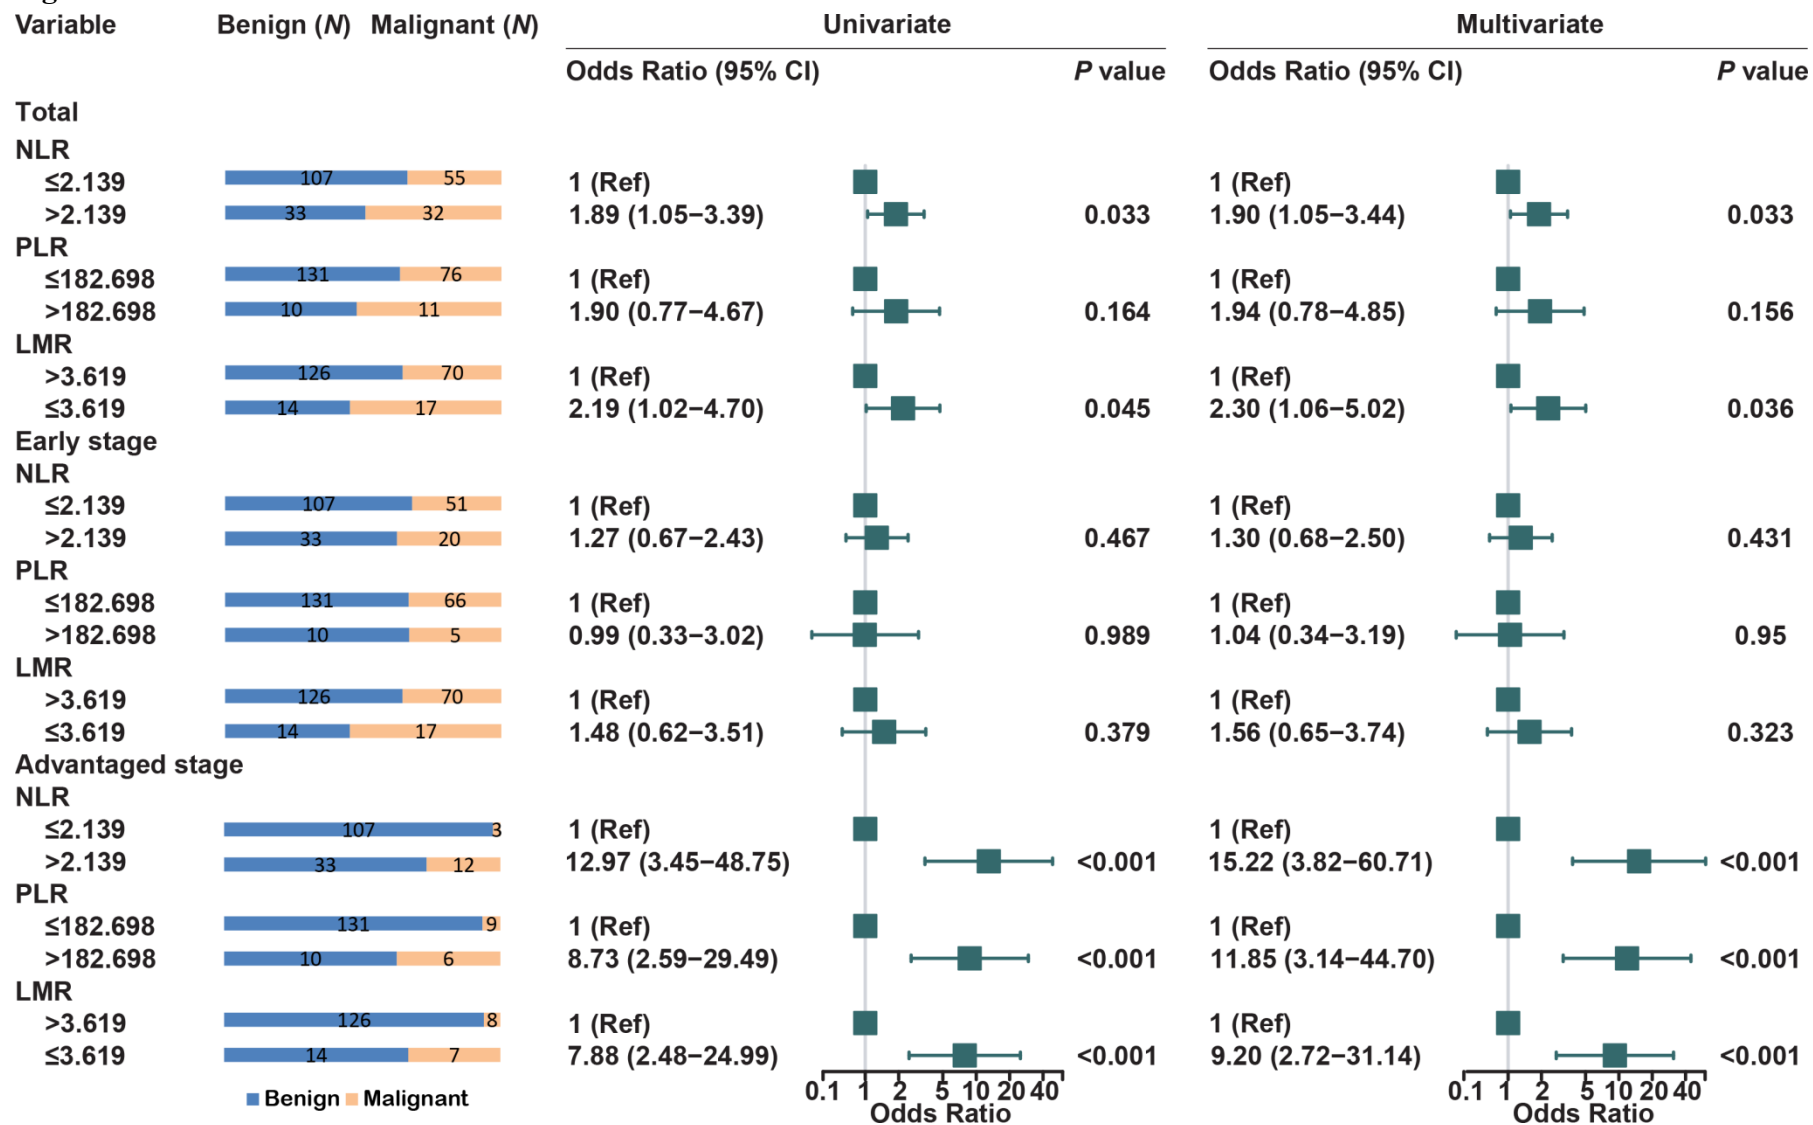



Figure S7.

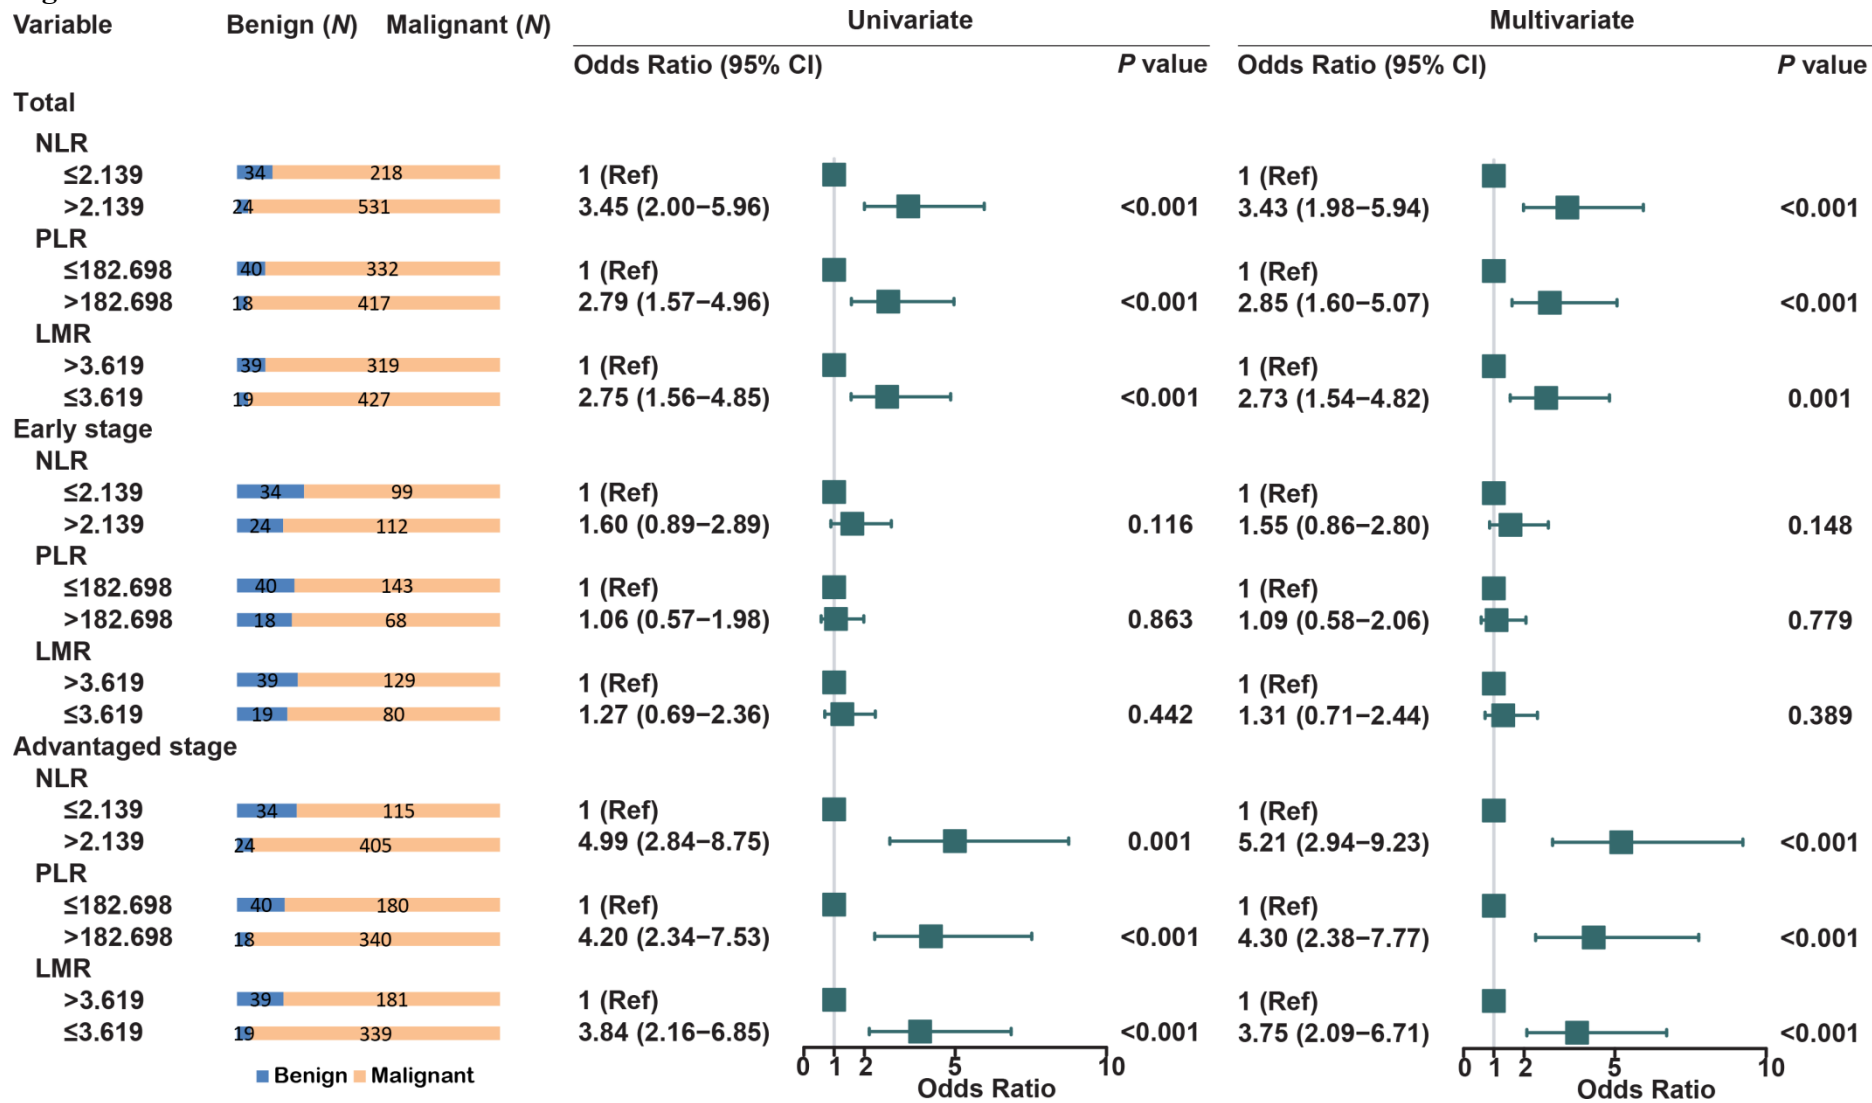

Supplement: jcav12p2687s1.pdf [file jcav12p2687s1.pdf]
